# Supplementary material for: Controlling the coassembly of highly amphiphilic block copolymers with a hydrolytic sol by solvent exchange
Source: Royal Society of Chemistry journal article supplement (doi:10.1039/c5ra00836k), 2015-01-01
Supplement: c5ra00836k1.pdf [file c5ra00836k1.pdf]

# Controlling the coassembly of highly amphiphilic block copolymers with a hydrolytic sol by solvent exchange – Supporting Information –

Stefan Guldin<sup>a†</sup>, Morgan Stefik<sup>b</sup>, Hiroaki Sai<sup>c</sup>, Ulrich Wiesner<sup>c</sup> & Ullrich Steiner<sup>a,‡,\*</sup>

## Full experimental details

**Material fabrication.** The poly(isoprene-*b*-ethylene oxide) (PI-*b*-PEO) BCP was synthesised by anionic polymerisation as described in reference<sup>1</sup>. The polymer characteristics were studied by gel permeation chromatography and NMR and determined as follows: molecular weight  $M_n = 33.5 \text{ kg mol}^{-1}$ , 23 wt% PEO, polydispersity index PDI = 1.03.

Titanium containing sol was synthesised by quickly adding 0.69 ml of HCl (37 %) into 1 ml of titanium ethoxide (purum) under vigorous stirring at ambient conditions and left age for 90 min.<sup>2</sup> Depending on the inorganic to organic weight ratio, the adequate amount of sol was subsequently mixed with PI-*b*-PEO copolymer in 7 ml THF (99.97 %). This ratio was determined by the weight of the resulting TiO<sub>2</sub> compared to the initial weight of the polymer in solution. For a weight ratio of 2:1 between the resulting TiO<sub>2</sub>, 0.87 ml sol was added to 0.1 g BCP. After solvent evaporation in a Petri dish at 50 °C, the dried hybrid material was redissolved in an azeotrope solvent mixture of toluene (apolar, 99.8 %) and 1-butanol (polar, 99 %). Typically a solid weight content of 70 mg polymer per ml was used. The solution was then solvent casted in a covered Petri dish at 40 °C and then left to dry for over 24 hours. The dry hybrid material was subsequently annealed by slow ramping to 130 °C (180 min linear ramp, 30 min dwell).

**Transmission Electron Microscopy (TEM).** TEM samples of the PI-*b*-PEO/TiO<sub>2</sub> mesostructure were prepared by sectioning the bulk materials to 50 nm with a Leica Ultracut UCT cryo-ultramicrotome and transferring the slices onto copper TEM grids. These samples were imaged in a Tecnai T12 Spirit TEM with an acceleration voltage of 120 keV.

**Small angle X-ray scattering (SAXS).** SAXS patterns were recorded in the G1 beamline in Cornell High Energy Synchrotron Source (CHESS) with a Flicam 2D CCD detector, with the beam energy at 10.5 keV and a sample-to-detector distance of 2.3 m.

<sup>a</sup>Department of Physics, University of Cambridge, J. J. Thomson Avenue, Cambridge, CB3 0HE, UK. <sup>b</sup>Department of Chemistry and Biochemistry, University of South Carolina, Columbia, 29208, USA. <sup>c</sup>Department of Materials Science and Engineering, Cornell University, Ithaca, New York, 14853, USA. <sup>†</sup>Present address: Department of Chemical Engineering, University College London, Torrington Place, London, WC1E 7JE, UK. <sup>‡</sup> Present address: Adolphe Merkle Institute, University of Fribourg, Chemin des Verdiers, 1700 Fribourg, CH. \*e-mail: ullrich.steiner@unifr.ch

**Supplementary Table S1 | Bragg spacings for investigated morphologies.**<sup>3–5</sup>.

| Sample | assigned morphology | $q^*$ | $q_{hkl}$     |               |               |               |
|--------|---------------------|-------|---------------|---------------|---------------|---------------|
| 1:1    | inverse hexagonal   | 0.192 | $\sqrt{3}q^*$ | $\sqrt{4}q^*$ | $\sqrt{7}q^*$ | $\sqrt{9}q^*$ |
| 1:2    | lamellar            | 0.175 | $2q^*$        | $3q^*$        | $4q^*$        |               |
| 1:3    | hexagonal           | 0.201 | $\sqrt{3}q^*$ | $\sqrt{4}q^*$ | $\sqrt{7}q^*$ |               |

**Supplementary Table S2 | Characteristic properties of employed BCPs.**

| $M_n$ PI- <i>b</i> -PEO | $N_{TOT}$<br>[kg/mol] | $M_n$ PEO | $N_{PEO}$<br>[kg/mol] | $f_{PEO}$ | PDI ( $= \frac{M_w}{M_n}$ )<br>[%] |
|-------------------------|-----------------------|-----------|-----------------------|-----------|------------------------------------|
| 33.5                    | 554                   | 7.7       | 175                   | 25.8      | 1.03                               |

**References**

1. J. Allgaier, A. Poppe, L. Willner, D. Richter, *Macromolecules* **1997**, *30*, 1582–1586.
2. P. Alberius, K. Frindell, R. Hayward, E. Kramer, G. Stucky, B. Chmelka, *Chemistry Of Materials* **2002**, *14*(8), 3284–3294.
3. I. Hamley, *The Physics of Block Copolymers*, Oxford University Press, 1st edition, **1998**.
4. I. Hamley, V. Castelletto, *Progress In Polymer Science* **2004**, *29*(9), 909D948.
5. S. Foerster, S. Fischer, K. Zielske, C. Schellbach, M. Sztucki, P. Lindner, J. Perlich, *Advances In Colloid And Interface Science* **2011**, *163*(1), 53–83.
